1  
2  
3  
4  
5  
6  
7  
8  
9  
10  
11  
12  
13  
14  
15  
16  
17  
18  
19  
20  
21  
22  
23  
24  
25  
26  
27  
28  
29  
30  
31  
32  
33  
34  
35  
36  
37  
38  
39  
40  
41  
42

## Multimodal brain imaging study of 36,678 participants reveals adverse effects of moderate drinking

**One Sentence Summary:** Moderate alcohol intake, consuming one or more daily alcohol units, has adverse effects on brain health.

Remi Daviet, PhD<sup>1</sup>, Gökhan Aydogan, PhD<sup>2</sup>, Kanchana Jagannathan, MS<sup>3</sup>, Nathaniel Spilka, BA<sup>3</sup>, Philipp D. Koellinger, PhD<sup>4</sup>, Henry R. Kranzler, MD<sup>3,5</sup>, Gideon Nave, PhD<sup>1\*</sup>, Reagan R. Wetherill, PhD<sup>3\*</sup>

<sup>1</sup>Marketing Department, The Wharton School, University of Pennsylvania, Philadelphia, PA, USA <sup>2</sup>Department of Economics, University of Zurich, Switzerland

<sup>3</sup>Department of Psychiatry, Perelman School of Medicine, University of Pennsylvania, Philadelphia, PA, USA

<sup>4</sup>La Follette School of Public Affairs, University of Wisconsin-Madison, Madison, WI, USA.

<sup>5</sup>Crescenz VAMC, Philadelphia, PA, USA

\*Corresponding Authors: Reagan R. Wetherill, Department of Psychiatry, 3535 Market Street, Suite 500, Philadelphia, PA 19104 USA

email: [rweth@pennmedicine.upenn.edu](mailto:rweth@pennmedicine.upenn.edu)

tel: +1 (215) 746-3953

Gideon Nave, The Wharton School, University of Pennsylvania, 3730 Walnut St., Philadelphia, PA 19104 USA

email: [gnave@wharton.upenn.edu](mailto:gnave@wharton.upenn.edu)

tel: +1 (215) 898-8248

43 **ABSTRACT**

44 Heavy alcohol consumption can have significant deleterious neural consequences, including  
45 brain atrophy, neuronal loss, poorer white matter fiber integrity, and cognitive decline. However,  
46 the effects of light-to-moderate alcohol consumption on brain structure remain unclear. Here, we  
47 examine the associations between alcohol intake and brain structure using multimodal imaging  
48 data from 36,678 generally healthy middle-aged and older adults from the UK Biobank,  
49 controlling for numerous potential confounds. We find negative associations between alcohol  
50 intake and global gray matter volume (GMV) and white matter volume (WMV), which become  
51 stronger as intake increases. An examination of the associations between alcohol intake and  
52 139 regional GMV imaging-derived phenotypes (IDPs) and 375 WM microstructure IDPs yielded  
53 304 (59.1%) significant findings, including 125 GMV IDPs that are spread across the brain and  
54 179 WM microstructure IDPs across multiple tract regions. In general, findings comport with the  
55 existing literature. However, a daily alcohol intake of as little as one to two units – 250 to 500 ml  
56 of a 4% beer or 76 to 146 ml of a 13% wine – is already associated with GMV deficits and  
57 altered WMV microstructure, placing moderate drinkers at risk.

58

59

60

61

62

63

64

65

66

67 Alcohol consumption is one of the leading contributors to the global burden of disease  
68 and to high healthcare and economic costs. Alcoholism, now diagnosed as Alcohol Use  
69 Disorder (AUD)<sup>1</sup>, is one of the most prevalent mental conditions worldwide<sup>2</sup>, with harmful effects  
70 on physical, cognitive, and social functioning<sup>3</sup>. Chronic excessive alcohol use leaves heavy  
71 drinkers vulnerable to direct and indirect adverse effects, including (but not limited to)  
72 cardiovascular disease<sup>4</sup>, nutritional deficiency<sup>5</sup>, cancer<sup>6</sup>, and accelerated aging<sup>7-9</sup>.

73 Chronic alcohol use affects both brain structure and connectivity<sup>9-11</sup>. Decades of  
74 neuroimaging studies have shown that chronic excessive alcohol consumption is associated  
75 with widespread patterns of macrostructural and microstructural changes, mostly affecting  
76 frontal, diencephalic, hippocampal, and cerebellar structures<sup>9,10,12</sup>. A recent meta-analysis of  
77 individuals with AUD (n = 433) showed lower gray matter volume (GMV) in the corticostriatal-  
78 limbic circuits, including regions of the prefrontal cortex, insula, superior temporal gyrus,  
79 striatum, thalamus, and hippocampus compared to healthy controls (n = 498)<sup>13</sup>. Notably, lower  
80 GMV in striatal, frontal, and thalamic regions was associated with AUD duration or lifetime  
81 alcohol consumption. Although alcohol consumption can produce global and regional tissue  
82 volume deficits, frontal regions are particularly vulnerable to alcohol toxicity<sup>14-16</sup> and the  
83 interactive effects of alcohol and age<sup>9,17</sup>.

84 Alcohol-related white matter (WM) microstructural alterations are a hallmark injury of  
85 AUD<sup>18-20</sup>. Neuroimaging studies have consistently shown WM degeneration of the corpus  
86 callosum in AUD<sup>3,21,22</sup>. However, the effects of chronic alcohol use on WM microstructure, as  
87 evidenced by decreased fractional anisotropy (FA) and increased mean diffusivity (MD), are not  
88 limited to the corpus callosum, but are also seen in the internal and external capsules, fornix,  
89 frontal forceps, superior cingulate, and longitudinal fasciculi<sup>3,21,23</sup>. Further, research indicates  
90 that anterior and superior WM systems are more vulnerable to heavy drinking than posterior and  
91 inferior systems<sup>24</sup>. However, because conventional diffusion tensor imaging (DTI) measures (FA  
92 and MD) are based on a simplistic brain tissue microstructure model, they fail to account for the

93 complexities of neurite geometry<sup>25</sup>. For example, the lower FA observed in individuals with AUD  
94 may reflect lower neurite density and/or greater orientation dispersion of neurites, which  
95 conventional DTI measures do not differentiate<sup>26,27</sup>.

96         Despite an extensive literature on brain structure and microstructure in individuals with  
97 AUD, research exploring associations between alcohol consumption across the drinking  
98 spectrum and brain structure and microstructure measures in the general population is limited.  
99 In some studies of middle-aged and older adults, moderate alcohol consumption was  
100 associated with lower total cerebral volume<sup>28</sup>, gray matter atrophy<sup>29,30</sup>, and lower density of gray  
101 matter in frontal and parietal brain regions<sup>30</sup>. However, other studies have failed to show an  
102 association<sup>31</sup>, and one study showed a positive association of light-to-moderate alcohol  
103 consumption and GMV in older men<sup>32</sup>. One interpretation of these findings is that an inverse U-  
104 shaped, dose-dependent association exists between alcohol use and brain structure, with light-  
105 to-moderate drinking being protective against and heavy drinking being a risk factor for  
106 reductions in GMV<sup>32</sup>. This interpretation was not supported by a longitudinal cohort study, which  
107 showed no difference in structural brain measures between abstinent individuals and light  
108 drinkers, and moderate-to-heavy drinkers showed GMV atrophy in the hippocampi and impaired  
109 WM microstructure (lower FA, higher MD) in the corpus callosum<sup>33</sup>.

110         The inconclusive nature of the evidence regarding the association between moderate  
111 alcohol intake and brain structure in the general population may reflect the literature's patchwork  
112 nature, consisting as it does of mostly small, unrepresentative studies with limited statistical  
113 power<sup>34,35</sup>. Moreover, most studies have not accounted for the effects of many relevant  
114 covariates and, therefore, have yielded potentially biased findings. Potential confounds that may  
115 be associated with individual differences in both alcohol intake and neuroanatomy include sex  
116 (women are more vulnerable than men)<sup>36</sup>, body mass index (BMI) (vulnerability increases as a  
117 function of BMI)<sup>37</sup>, age (older adults are more vulnerable than younger adults)<sup>38,39</sup>, and genetic  
118 population structure (i.e., biological characteristics that are correlated with environmental

119 causes)<sup>40</sup>. Similar to other research fields, progress in this area may also be limited by  
120 publication bias<sup>41</sup>.

121         The current study examines the associations between alcohol intake and measures of  
122 GM structure and WM microstructure in the brain in the largest population sample available to  
123 date. We address the existing literature's limitations through a preregistered analysis of  
124 multimodal imaging data from the UK Biobank (UKB)<sup>42-44</sup> that controls for numerous potential  
125 confounds. The UKB, a prospective cohort study representative of the United Kingdom (UK)  
126 population aged 40-69 years, is the largest available collection of high-quality MRI brain scans,  
127 alcohol-related behavioral phenotypes, and measurements of the socioeconomic environment.  
128 The UKB brain imaging data include three structural modalities, resting and task-based fMRI,  
129 and diffusion imaging<sup>42-44</sup>. The WM fiber integrity measures available in the UKB include the  
130 conventional FA and MD metrics and neurite orientation dispersion and density imaging  
131 (NODDI) measures<sup>26</sup>. Such measures offer information on WM microstructure and estimates of  
132 neurite density (i.e., intracellular volume fraction; ICVF), extracellular water diffusion (i.e.,  
133 isotropic volume fraction; ISOVF), and tract complexity/fanning (i.e., orientation dispersion, OD).  
134 This allows us to assess the nature of the association between alcohol intake and WM  
135 microstructure in greater detail than any previous studies on the topic. Specifically, we assess  
136 associations between alcohol intake (i.e., mean daily alcohol units; one unit=10 ml or 8 g of  
137 ethanol) and imaging derived phenotypes (IDPs) of brain structure (total GMV, total WMV, and  
138 139 regional GMVs), as well as 375 IDPs of WM microstructure (DTI and NODDI indices), using  
139 data from 36,678 UKB participants. Our analyses adjust for numerous covariates (see Methods  
140 for an exhaustive list of these).

141         Our sample size provides us statistical power of 90% to detect effects as small as  $f^2 >$   
142 0.00078 at the 5% significance level, after accounting for multiple hypotheses testing ( $p_{\text{uncorrected}}$   
143  $< 1.64 \times 10^{-4}$ ). Given previous findings, we hypothesized to see a reduction in global GMV and  
144 WMV in heavy drinkers. However, the large general population sample provided sufficient

145 sensitivity to qualitatively and quantitatively assess how effects vary across the entire drinking  
 146 spectrum and test at what threshold effects emerge. Our well-powered design also allowed us  
 147 to explore whether the effects of alcohol intake on GMV and WM microstructure are localized in  
 148 specific regions or conversely widespread across the brain and compare the effects across  
 149 various WM integrity indicators.

## 150 RESULTS

151 Table 1 summarizes the characteristics of the 36,678 participants (52.8% female),  
 152 including the distributions of age, daily alcohol units and global GMV and WMV. Participants  
 153 were healthy, middle-aged and older adults. We normalize all of the IDPs for head size by  
 154 multiplying the raw IDP by the head size scaling factor.

155 **Table 1.** Empirical distributions of variables.

| Variable                                         | Females                                                                                                              | Males                                                                                                                 | All                                                                                                                    |
|--------------------------------------------------|----------------------------------------------------------------------------------------------------------------------|-----------------------------------------------------------------------------------------------------------------------|------------------------------------------------------------------------------------------------------------------------|
| Sample size                                      | 19,390                                                                                                               | 17,288                                                                                                                | 36,678                                                                                                                 |
| Abstainers                                       | 2,006                                                                                                                | 899                                                                                                                   | 2,905                                                                                                                  |
| Age:<br>Mean (SD)                                | <br>48 63 78<br>63.09 (7.37)      | <br>48 63 78<br>64.42 (7.60)      | <br>48 63 78<br>63.72 (7.51)      |
| Daily alcohol units:<br>Mean (SD)                | <br>0 2 4<br>0.87 (0.91)          | <br>0 2 4<br>1.49 (1.32)          | <br>0 2 4<br>1.16 (1.16)          |
| Standardized<br>log(1+daily units):<br>Mean (SD) | <br>-2 0 2<br>-0.24 (0.96)        | <br>-2 0 2<br>0.27 (0.97)         | <br>-2 0 2<br>0.00 (1.00)         |
| Total GMV (cm <sup>3</sup> ):<br>Mean (SD)       | <br>494 616 738<br>593.42 (48.07) | <br>494 616 738<br>641.67 (52.27) | <br>494 616 738<br>616.16 (55.58) |
| Total WMV (cm <sup>3</sup> ):<br>Mean (SD)       | <br>411 547 683                   | <br>411 547 683                   | <br>411 547 683                   |

|                                                                       |                                                                                                                    |                                                                                                                     |                                                                                                                      |
|-----------------------------------------------------------------------|--------------------------------------------------------------------------------------------------------------------|---------------------------------------------------------------------------------------------------------------------|----------------------------------------------------------------------------------------------------------------------|
|                                                                       | 514.06 (47.70)                                                                                                     | 584.53 (54.08)                                                                                                      | 547.27 (61.80)                                                                                                       |
| Head size scaling factor<br>(greater for smaller heads):<br>Mean (SD) | 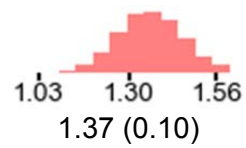<br>1.03 1.30 1.56<br>1.37 (0.10) | <br>1.03 1.30 1.56<br>1.21 (0.09) | <br>1.03 1.30 1.56<br>1.29 (0.12) |

156 Note. SD = standard deviation, GMV = gray matter volume, WMV = white matter volume.

157

158 **Relationship between Global GMV and WMV and alcohol intake.** The scatter plots in

159 Figure 1 and Figure 2 illustrate the relationships of the global IDPs (GMV and WMV, both  
160 normalized for head size) with age and daily alcohol intake (in log scale) within sex. The figures  
161 include local polynomial regression lines (LOWESS), which indicate negative trends on every  
162 dimension. This preliminary analysis also demonstrates slight non-linearities in both dimensions,  
163 with curves appearing concave. Therefore, our subsequent regression models include both  
164 linear and quadratic terms for age and logged alcohol intake, test the joint significance of the  
165 associations of the two terms with brain structure via an F-test (see Methods), and quantify the  
166 effect size via the IDP variance explained by alcohol intake, above the other covariates ( $\Delta R^2$ ).

167 We estimate linear regressions to quantify the relationships between daily alcohol intake,  
168 as well as its interactions with age and sex, and the global IDPs. Our main analyses ( $N =$   
169 36,585) controls for age, height, handedness, sex, smoking status, socioeconomic status,  
170 genetic ancestry, and county of residence (see Methods). Table 2 summarizes the results,  
171 revealing that both global IDPs decrease as a function of daily alcohol intake. Alcohol intake  
172 explains 1% of the variance in global GMV and 0.3% of the variance in global WMV across  
173 individuals beyond all other control variables (both  $p < 10^{-16}$ ). Additional analyses excluding  
174 abstainers ( $N = 33,733$ ) or heavy drinkers ( $N = 34,383$ ), as well as models using an extended  
175 set of covariates (addition of BMI, educational attainment, and weight;  $N = 36,678$ ) yield similar  
176 findings, though the variance explained by alcohol intake beyond other control variables is  
177 reduced to 0.4% for GMV and 0.1% for WMV when heavy drinkers are excluded (Extended  
178 Data Tables 1 and 2).

179           In the eight regressions we tested, the interaction between alcohol intake and sex is not  
180 significant at the 1% level, except weakly for GMV when including the extended control  
181 variables (BMI, weight, and educational attainment). Given our large sample size, this indicates  
182 that if there is any effect, it is negligible. Similarly, the interaction between intake and age is  
183 weakly significant for the regressions excluding abstainers only, indicating that it is also  
184 negligible if any effect exists. None of the interaction terms are significant at the 0.1% level.  
185 Consequently, we excluded the interaction terms from the analyses of local IDPs.

186           To evaluate the magnitude of the main effects of alcohol intake on the global IDPs, we  
187 use our regression models to calculate the predicted change in global GMV and WMV  
188 associated with an increase of daily alcohol intake by one unit (Table 3A). This prediction is  
189 similar when using different sets of control variables and when excluding abstainers or heavy  
190 drinkers. Given the non-linear relationship between global IDPs and alcohol intake, the effect  
191 varies across the drinking range. There is virtually no change (less than .03 standard deviations)  
192 in the predicted global GMV and WMV when shifting from abstinence to one daily alcohol unit.  
193 However, the effect of intake increases as the number of daily units increases. An increase from  
194 one to two daily units is associated with a decrease of 0.127 and 0.074 standard deviations in  
195 predicted global GMV and WMV, respectively. A change from two to three daily units is  
196 associated with a 75% greater decrease of 0.223 and 1.28 standard deviations in GMV and  
197 WMV, respectively. Table 3B benchmarks the predicted effect magnitudes against the effects  
198 associated with aging for an average 50-year-old UKB participant, based on our regression  
199 models. For illustration, the effect associated with a change from one to two daily alcohol units  
200 is equivalent to the effect of aging 2 years, where the increase from two to three daily units is  
201 equivalent to aging 3.5 years.

202           Figure 3 displays the averages of the two global IDPs in sub-samples binned according  
203 to their daily alcohol consumption range, illustrating the non-linear nature of the relationship  
204 between daily units and the global measures. The figure includes statistical tests that compare



205 the average of the IDPs in the different sub-samples to their average in participants who  
206 consume one daily unit or less. These tests identify statistically significant effects for all bins of  
207 participants consuming more than one daily units, including those consuming as little as 1-2  
208 daily units. These effects are observed both in the full sample and within sex.

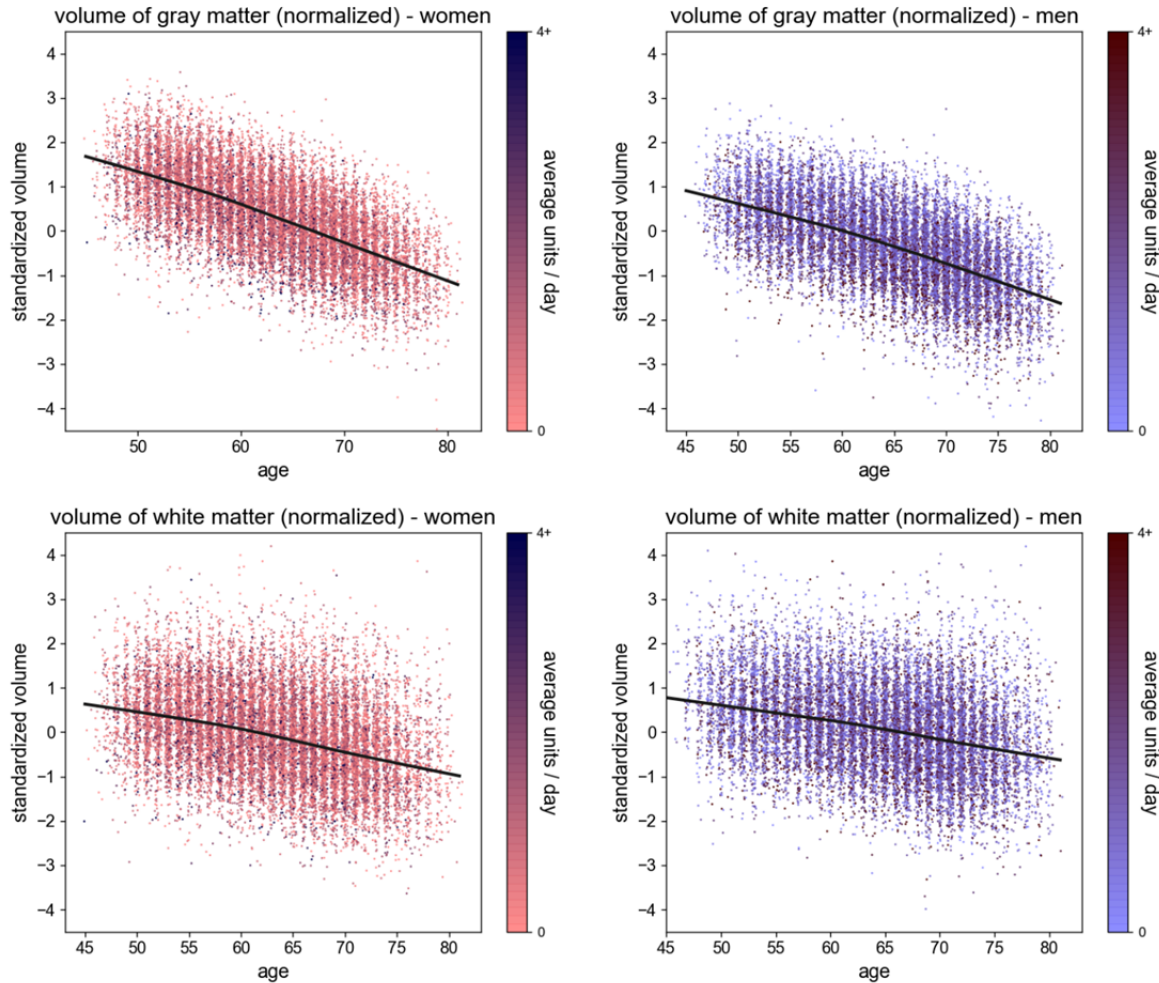

209

210

211 **Figure 1.** Scatter plots of whole-brain standardized gray matter volume (women, upper left;  
212 men, upper right) and standardized white matter volume (women, lower left; men, lower right),  
213 all normalized for head size, against the individual's age (x-axis). The plots also show the  
214 LOWESS regression line (smoothness:  $\alpha=0.2$ ). The 95% confidence interval is indistinguishable  
215 from the regression line. The colors are representative of the average daily alcohol  
216 consumption.

217

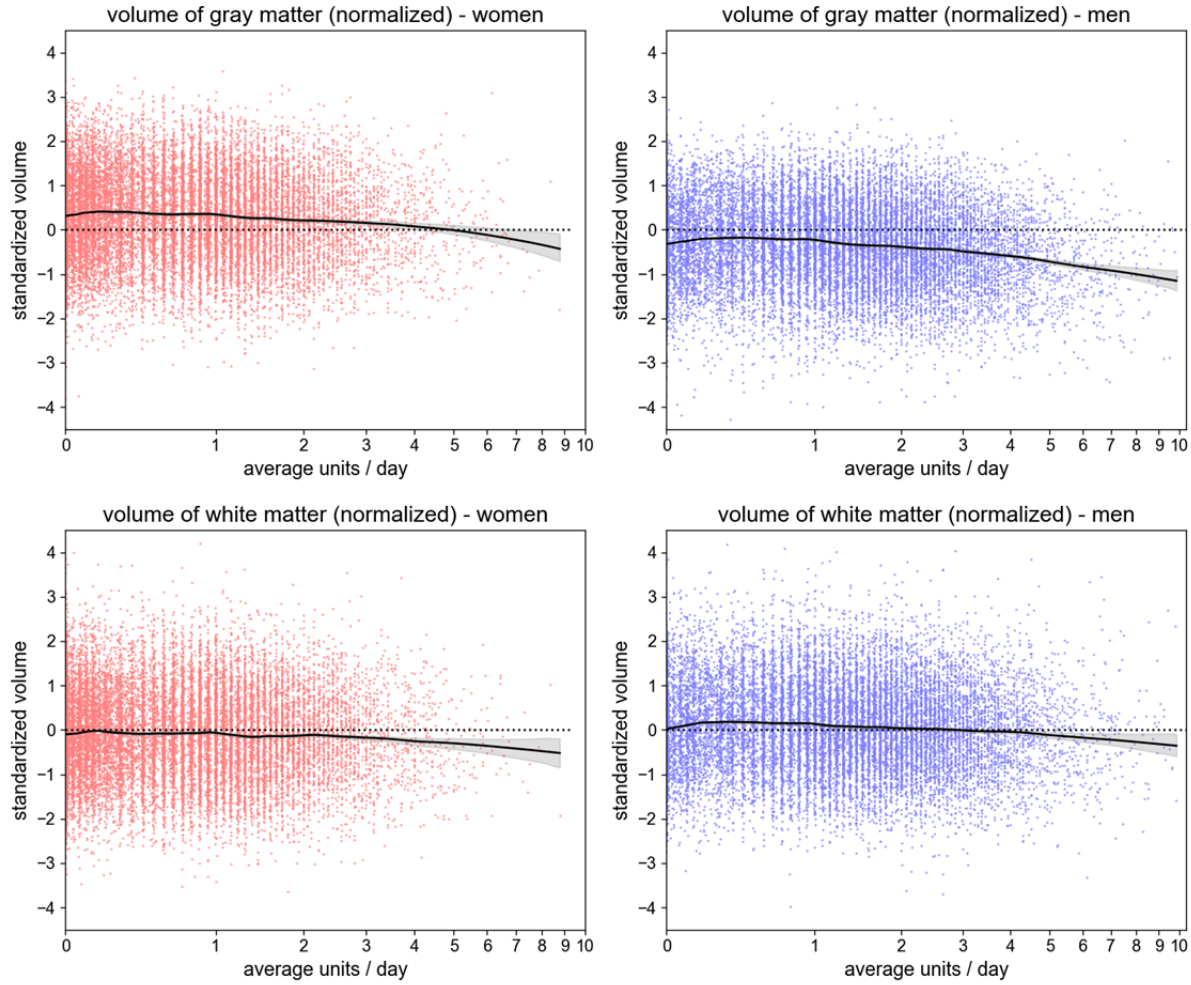

218

219

220

221

222

223

224

225

226

227

**Figure 2.** Scatter plots of whole-brain standardized gray matter volume (women, upper left; men, upper right) and standardized white matter volume (women, lower left; men, lower right), all normalized for head size, against the individual's daily alcohol consumption (x-axis, in log scale). The plots also show the LOWESS regression line (smoothness:  $a=0.2$ ), with its 95% confidence interval.

228 **Table 2.** Regression analysis with global IDPs as outcome variables. All regressions include  
 229 standard controls. Intake is measured in  $\log(1 + \text{daily units of alcohol})$ .

| Variable                                                                                     | Dependent variable: global GMV             |                             | Dependent variable: global WMV                                                               |                            |
|----------------------------------------------------------------------------------------------|--------------------------------------------|-----------------------------|----------------------------------------------------------------------------------------------|----------------------------|
|                                                                                              | N: 36,678 (d.f.: 36,585), $R^2$ : 0.514    |                             | N: 36,678 (d.f.: 36,585), $R^2$ : 0.514                                                      |                            |
|                                                                                              | Regression Coefficient (S.Err),<br>95% CI  | t-stat<br>(p-value)         | Regression Coefficient (S.Err),<br>95% CI                                                    | t-stat<br>(p-value)        |
| intake                                                                                       | -0.1095 (0.0058),<br>CI: [-0.1209,-0.0982] | -19.0<br>( $p < 1.0e-16$ )  | -0.0650 (0.0078),<br>CI: [-0.0802,-0.0498]                                                   | -8.4<br>( $p < 1.0e-16$ )  |
| intake <sup>2</sup>                                                                          | -0.0651 (0.0037),<br>CI: [-0.0723,-0.0579] | -17.7<br>( $p < 1.0e-16$ )  | -0.0370 (0.0050),<br>CI: [-0.0468,-0.0273]                                                   | -7.5<br>( $p = 7.8e-14$ )  |
| intake x male                                                                                | 0.0174 (0.0080),<br>CI: [0.0018,0.0330]    | 2.2<br>( $p = 2.9e-02$ )    | 0.0164 (0.0107),<br>CI: [-0.0046,0.0374]                                                     | 1.5<br>( $p = 1.2e-01$ )   |
| intake x std. age                                                                            | 0.0080 (0.0037),<br>CI: [0.0008,0.0152]    | 2.2<br>( $p = 3.0e-02$ )    | 0.0111 (0.0050),<br>CI: [0.0014,0.0208]                                                      | 2.2<br>( $p = 2.5e-02$ )   |
| std. age                                                                                     | -0.5991 (0.0038),<br>CI: [-0.6066,-0.5916] | -157.0<br>( $p < 1.0e-16$ ) | -0.3213 (0.0051),<br>CI: [-0.3313,-0.3112]                                                   | -62.6<br>( $p < 1.0e-16$ ) |
| std. age <sup>2</sup>                                                                        | -0.0378 (0.0034),<br>CI: [-0.0445,-0.0311] | -11.0<br>( $p < 1.0e-16$ )  | -0.0127 (0.0046),<br>CI: [-0.0217,-0.0037]                                                   | -2.8<br>( $p = 5.7e-03$ )  |
| Against model without intake and interactions<br>Delta $R^2$ : 0.0099, F-test: $p < 1.0e-16$ |                                            |                             | Against model without intake and interactions<br>Delta $R^2$ : 0.0033, F-test: $p < 1.0e-16$ |                            |

230

231

232 **Table 3A.** Predicted average additional effect (in standard deviations of IDP) of increasing  
 233 alcohol intake by one daily unit on whole-brain gray matter volume and white matter volume, for  
 234 models with different sets of controls (first and second columns), and for standard controls with  
 235 samples excluding abstainers (third column) and heavy drinkers (last column).

| Intake changes | Standard controls |            | Extended controls |            | Excluding abstainers |            | Excluding heavy drinkers |            |
|----------------|-------------------|------------|-------------------|------------|----------------------|------------|--------------------------|------------|
|                | Global GMV        | Global WMV | Global GMV        | Global WMV | Global GMV           | Global WMV | Global GMV               | Global WMV |
| 0 to 1 unit    | -0.030            | -0.020     | -0.038            | -0.017     | -0.019               | -0.015     | -0.034                   | -0.019     |
| 1 to 2 units   | -0.127            | -0.074     | -0.126            | -0.073     | -0.123               | -0.070     | -0.107                   | -0.067     |
| 2 to 3 units   | -0.223            | -0.129     | -0.214            | -0.129     | -0.226               | -0.124     | -0.181                   | -0.116     |
| 3 to 4 units   | -0.319            | -0.184     | -0.302            | -0.185     | -0.330               | -0.179     | -0.255                   | -0.164     |
| 0 to 4 units   | -0.699            | -0.407     | -0.682            | -0.404     | -0.699               | -0.388     | -0.577                   | -0.367     |

236 Note. GMV = gray matter volume; WMV = white matter volume.

237

238

239

240 **Table 3B.** Equivalent effect of ageing in terms of additional years for an average 50-year old  
 241 individual.

| Intake changes | Standard controls |                        |            |                        |
|----------------|-------------------|------------------------|------------|------------------------|
|                | Global GMV        | Equivalent aging at 50 | Global WMV | Equivalent aging at 50 |
| 0 to 1 unit    | -0.030            | 0.5 years              | -0.020     | 0.5 years              |
| 1 to 2 units   | -0.127            | 2.0 years              | -0.074     | 2.0 years              |
| 2 to 3 units   | -0.223            | 3.5 years              | -0.129     | 3.5 years              |
| 3 to 4 units   | -0.319            | 4.9 years              | -0.184     | 4.9 years              |
| 0 to 4 units   | -0.699            | 10.2 years             | -0.407     | 10.4 years             |

242 *Note.* GMV = gray matter volume.

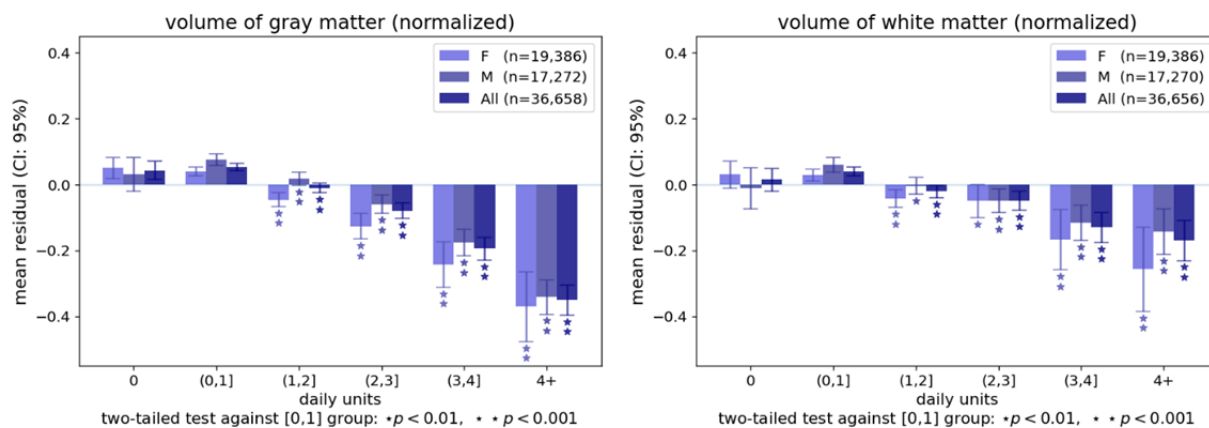

243 **Figure 3.** Bar plots representing the average volume of whole-brain gray and white matter  
 244 volume for individuals grouped by the number of daily alcohol units after controlling for standard  
 245 control variables (keeping the regression residual). The mean residuals are in terms of standard  
 246 deviations of the dependent variable. The error bars represent the 95% confidence interval.  
 247 \* $p < 0.01$  and \*\* $p < .0001$  for groups showing a significant difference against the group consuming  
 248 up to one alcohol unit daily.  
 249

250 **Relationship between regional GMV and alcohol intake.** To investigate whether the  
 251 reduction in global GMV associated with alcohol intake stems effects of drinking in specific  
 252 regions, we estimate regression models to quantify the association of alcohol intake with a total  
 253 of 139 regional GMV IDPs. These IDPs were derived using parcellations from the Harvard-  
 254 Oxford cortical and subcortical atlases and Diedrichsen cerebellar atlas. Of the 139 GMV IDPs,  
 255

256 125 (88.9%) are significantly associated with log alcohol intake (see Extended Data Table 3).  
257 We observe the strongest effects in frontal, parietal, and insular cortices, temporal and cingulate  
258 regions, putamen, amygdala and the brain stem. In these regions, alcohol intake explains  
259 between 0.3%-0.4% of the variance in local GMV above the other covariates. Extended Data  
260 Figure 1 illustrates the marginal effect of increasing daily alcohol units on regional GMV IDPs,  
261 grouped by lobe. All of the associations are negative, except the association involving the right  
262 pallidum – where the effect size is positive but very small ( $\Delta R^2 = 0.0005$ ). Importantly, the  
263 largest regional effect was less than half the size of the association between drinking and global  
264 GMV, indicating that the global reduction in GMV associated with alcohol intake is the result of  
265 aggregating smaller effects that are widespread across the brain (rather than constrained to  
266 specific areas).

267 In a similar fashion to the analysis using the global IDPs, we calculate the average  
268 localized GMV IDP for each daily alcohol unit bin (Extended Data Figure 2) and test their  
269 difference against the average of the group drinking up to one unit per day, within sexes and in  
270 the overall sample. As expected, the number of regional GMV IDPs showing a significant  
271 negative association with alcohol intake, as well as these associations' magnitudes, increases  
272 as the average number of daily alcohol units increases. There are few regions where lower  
273 GMV is either not observed as a function of drinking or only apparent among heavy drinkers  
274 (e.g., fusiform cortex). However, in most regions, GMV reduction is already visible in the groups  
275 that drink moderately (i.e., consuming 1-2 or 2-3 daily units). Thus, the influence of moderate  
276 alcohol intake on GMV also appears to be widespread across the brain, and it is detectable in  
277 both males and females.

278 **Relationship between regional WM microstructure and alcohol intake.** To evaluate  
279 how drinking influences the different indicators of WM integrity at the regional level, we estimate  
280 linear regressions to quantify the association of alcohol intake with 375 IDPs, including FA, MD,  
281 ICVF, ISOVF, and OD measures extracted via averaging parameters across 74 WM tract

282 regions<sup>45</sup>. Of the 375 WM microstructure IDPs, 179 (47.7%) are significantly associated with  
283 alcohol intake (Extended Data Table 4). Generally, alcohol intake is related to lower coherence  
284 of water diffusion, lower neurite density, and higher magnitude of water diffusion, indicating less  
285 healthy WM microstructure with increasing alcohol intake.

286 To visualize the magnitude of WM microstructure IDP associations with alcohol intake,  
287 Figure 4 displays the statistically significant and non-significant effects, alongside the average  
288 change in normalized WM microstructure IDPs associated with a mean daily alcohol intake  
289 increasing from 2 to 3 units. Thirteen WM tract regions show consistent significant associations  
290 with lower FA and higher ISOVF and MD. The strongest effects of these are in the fornix, where  
291 WM integrity was previously found to be affected by drinking in studies of populations with  
292 AUD<sup>3,21,23</sup>. In the fornix, alcohol intake accounts for 0.45% of the variance in ISOVF, 0.35% of  
293 the variance in MD, and 0.32% of the variance in FA. Other WM tract regions showing a similar  
294 pattern yet with effects of weaker magnitude include commissural fibers (genu and body of the  
295 corpus callosum, bilateral tapetum), projection fibers (bilateral anterior corona radiata),  
296 associative fibers (fornix cres+stria terminalis, left inferior longitudinal fasciculus), and the  
297 bilateral anterior thalamic radiations.

298 Among the NODDI measures, ISOVF showed the strongest effects of alcohol intake all  
299 over the brain, most notably in the tract regions discussed above. The associations between  
300 drinking and ICVF are also consistently negative yet smaller in size, with daily alcohol intake  
301 explaining no more than 0.1% of the variance beyond other control variables in all ICVF IDPs.  
302 The associations with OD, which is a measure of tract complexity, are either positive, negative  
303 or absent, and while some are statistically significant, they are all very small in size ( $\Delta R^2 <$   
304 0.001 for all IDPs).

305

306

307

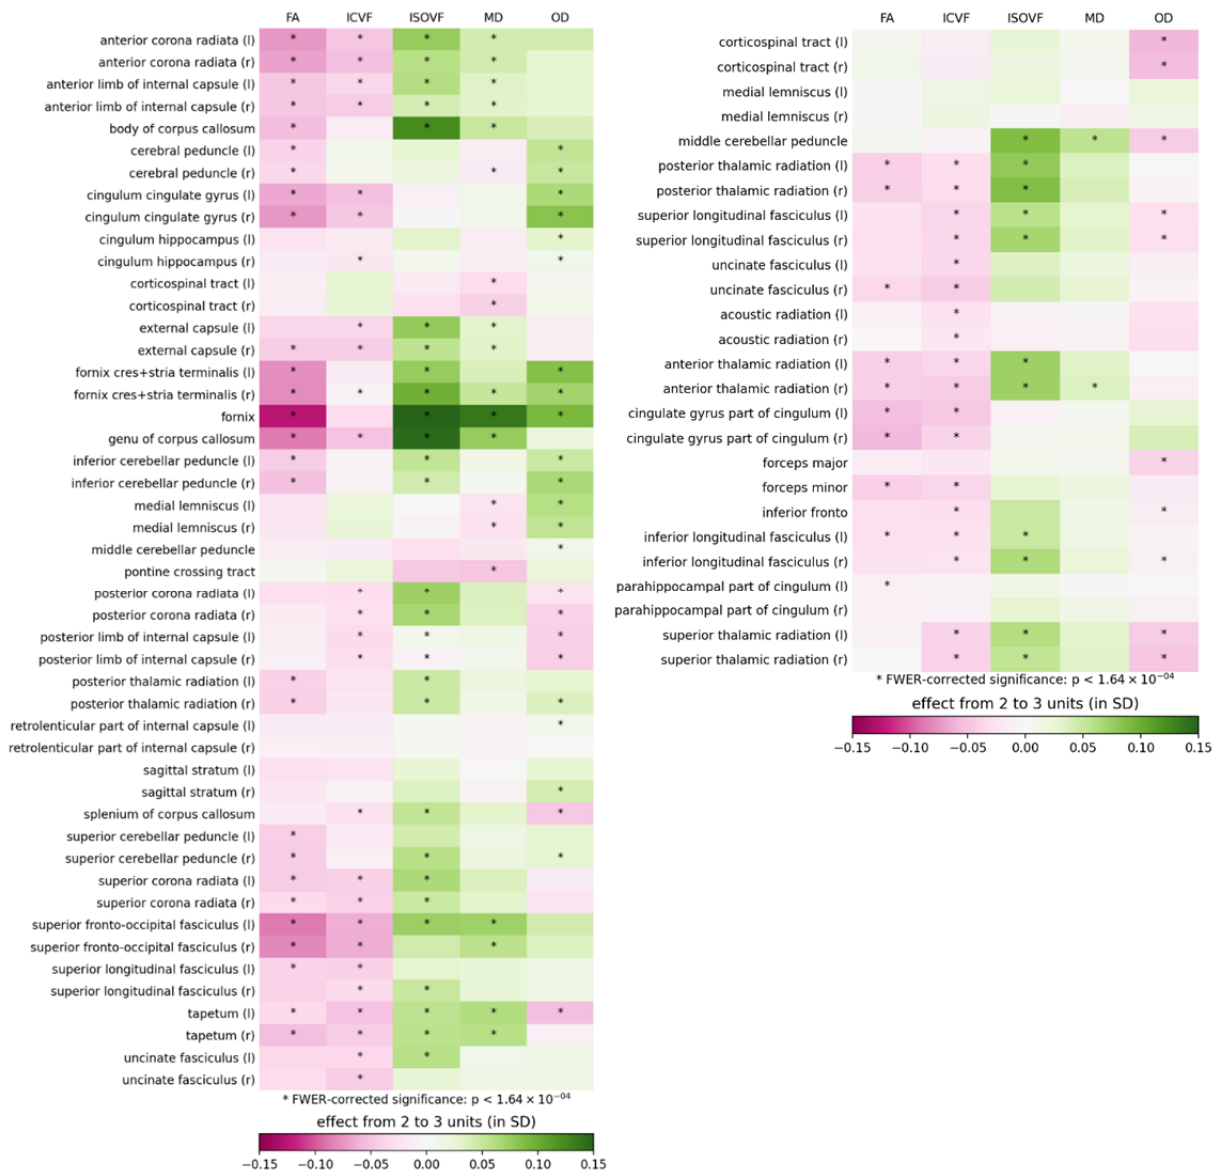

308 **Figure 4.** Matrix representing the effect of consuming 2-3 daily alcohol units on water matter  
 309 microstructure indices of interest across white matter tract regions. r = right, l = left. \* $p <$   
 310  $1.64 \times 10^{-4}$

311

312 **DISCUSSION**

313 We report a multimodal brain imaging study of 36,678 middle-aged and older adults of  
 314 European descent, a population sample whose reported alcohol consumption spanned the  
 315 spectrum from abstinence to heavy drinking. The scale and granularity of the data provide  
 316 ample statistical power to identify small effects while accounting for important potential

317 confounds. We observe negative relationships between alcohol intake and global measures of  
318 gray and white matter, regional GMVs, and WM microstructure indices. The effects we identify  
319 are widespread across the brain, and their magnitude increases with the average absolute  
320 number of daily alcohol units consumed.

321 Notably, the negative associations we observe with global IDPs are already detectable in  
322 those who consume between 1 and 2 alcohol units daily. This finding has important implications  
323 for recommendations regarding safe drinking levels, both in males and females. In 2016, the UK  
324 Chief Medical Officers published new “low-risk” alcohol consumption guidelines that advise  
325 limiting alcohol intake to 14 units per week<sup>32</sup>. One alcohol unit is equivalent to 10 ml or 8 g of  
326 ethanol, the amount contained in 25 ml of 40% spirits, 250 ml of 4% beer, or 76 ml of 13% wine.  
327 Many drinking establishments serve drinks that contain 35-50 ml of 40% spirits (1.4-2 units),  
328 568 ml of 4% beer (2.27 units), and 175 ml of 13% wine (2.30 units)<sup>33</sup>. Thus, in the UK,  
329 consuming just one alcoholic drink (or two units of alcohol) daily can have negative effects on  
330 brain health. This has important public health implications insofar as 57% of UK adults, or an  
331 estimated 29.2 million individuals<sup>28</sup> endorse drinking during the past week.

332 The negative associations between alcohol intake and total GMV and WMV are  
333 consistent with prior studies of early middle-aged<sup>46</sup> and older adults<sup>28,47</sup>. Because men consume  
334 more alcohol units per day and had larger global GMV and WMV, we further examine the effect  
335 of sex in detail. We find negative associations between alcohol intake and the global IDPs for  
336 both sexes and weak evidence for interactive effects between alcohol intake and sex on the  
337 brain. These findings are similar to a recent study of early middle-aged adult moderate drinkers  
338 that showed smaller brain volumes associated with moderate alcohol consumption in both men  
339 and women<sup>46</sup>. The weak sex-by-alcohol interactions also comport with the findings of an earlier  
340 longitudinal study in individuals with AUD<sup>38</sup>; however, other cross-sectional studies have  
341 reported greater volume deficits in women than men<sup>48,49</sup>.

342



343           Although nearly 90% of all regional GMVs show significant negative associations with  
344 alcohol intake, the most extensively affected regions included the frontal, parietal, and insular  
345 cortices, with deficits also in temporal and cingulate regions. Associations are also marked in  
346 the brain stem, putamen, and amygdala. The share of variance explained by alcohol intake for  
347 these regions is smaller in size than for global GMV, suggesting that the latter is the result of  
348 aggregation of many small effects that are widespread, rather than a localized effect that is  
349 limited to specific regions. Alcohol intake is further associated with poorer WM microstructure  
350 (lower FA and higher ISOVF and MD) in specific classes of WM tract regions. The commissural  
351 fibers (genu and body of the corpus callosum, bilateral tapetum), projection fibers (bilateral  
352 anterior corona radiata), associative bundles (fornix, fornix cres+stria terminalis, left inferior  
353 longitudinal fasciculus), and the bilateral anterior thalamic radiations show the most consistent  
354 associations with alcohol intake, with the fornix showing the strongest effects. The fornix is the  
355 primary outgoing pathway from the hippocampus<sup>50</sup>, and WM microstructural alterations in the  
356 fornix are consistently associated with heavy alcohol use and memory impairments<sup>3,51</sup>.  
357 Moreover, recent research indicates that one extreme-drinking episode can cause acute WM  
358 damage to the fornix, suggesting that the fornix may be particularly vulnerable to alcohol's  
359 effects.

360           Our findings are partly consistent with studies of individuals with AUD<sup>18,52</sup>. The pattern of  
361 microstructural alterations in our general population sample show that widespread WM  
362 alterations are present across multiple WM systems. Like individuals with AUD, alcohol intake in  
363 this healthy population sample is associated with microstructural changes in superficial WM  
364 systems functionally related to GM networks, including the frontoparietal control and attention  
365 networks, and the default mode, sensorimotor, and cerebellar networks. Deeper WM systems  
366 (superior longitudinal fasciculus and dorsal frontoparietal systems, inferior longitudinal  
367 fasciculus system, and deep frontal WM) thought to be involved in cognitive functioning by  
368 regulating reciprocal connectivity<sup>52,53</sup> are also associated with alcohol intake. Within these WM

369 systems, alcohol intake is most strongly associated with ISOVF, MD, and FA WM microstructure  
370 indices; whereas, associations with ICVF are small, and OD associations are inconsistent or  
371 nonexistent. Alcohol intake shows positive associations with ISOVF and MD and negative  
372 associations with FA. This pattern of alcohol-associated WM microstructural disruption supports  
373 previous research showing excessive intracellular and extracellular fluid in individuals with  
374 AUD<sup>20</sup>. Given that alcohol increases blood-brain permeability<sup>54</sup> and activates pro-inflammatory  
375 cytokines in the brain<sup>55</sup>, the association between alcohol intake and higher ISOVF (extracellular  
376 water diffusion) may be due to inflammatory demyelination. For example, higher ISOVF is  
377 evident in WM lesions of multiple sclerosis, characterized histopathologically by inflammatory  
378 demyelination associated with blood-brain permeability and axonal injury<sup>56,57</sup>. Additional  
379 research is warranted; however, these findings suggest that even low-moderate alcohol intake  
380 increases intracellular and extracellular water diffusion in WM, which may be a result of alcohol-  
381 induced inflammatory demyelination.

382         Our study is not without limitations, which provide opportunities for further research.  
383 First, we rely on a sample of middle-aged individuals of European ancestry living in the UK. We  
384 hope that future work will test the generalizability of our findings to individuals from other  
385 populations and in other age groups. It is reasonable to expect that the relationship we observe  
386 would differ in younger individuals who have not experienced the chronic effects of alcohol on  
387 the brain. An additional limitation stems from the self-reported alcohol intake measures in the  
388 UK Biobank, which cover only the past year. Such estimates do not adequately reflect drinking  
389 prior to the past year and are susceptible to reporting and recall bias<sup>38,39</sup>. Further, our analyses  
390 do not account for individuals with a past diagnosis of AUD. Earlier studies have shown that the  
391 brain shows some recovery with prolonged sobriety, but this recovery varies with age and sex,  
392 and recovery might be incomplete<sup>58-60</sup>. Thus, a past diagnosis of AUD would likely influence our  
393 results. We hope that future studies will shed light on how a history of AUD with prolonged  
394 recovery influences brain structure in middle-aged and older adults.

395 In summary, this large-scale brain imaging sample provides additional evidence of  
396 alcohol's adverse effects on brain macrostructure and microstructure in a general population  
397 sample of middle-aged and older adults. Alcohol intake is negatively associated with global  
398 brain volume measures, regional GMVs, and WM microstructure. The associations between  
399 alcohol intake and regional GMV are evident across the entire brain, with the largest deficits  
400 observed in frontal, parietal, and insular cortices, temporal and cingulate regions, the brain  
401 stem, putamen, and amygdala. Alcohol intake is related to WM microstructural alterations in  
402 several WM tract regions connecting large-scale networks and deeper WM systems. Most of  
403 these adverse effects are already apparent with an average consumption of only one to two  
404 daily alcohol units. Thus, this multimodal imaging study highlights the risk that even moderate  
405 drinking poses on the brain in middle-aged and older adults.

## 406 **Methods**

### 407 **Sample, procedure and exclusion criteria**

408 Our sample comprised 36,678 individuals of European ancestry from the UKB, all study  
409 participants whose data were available as of September 1, 2020. All UK Biobank  
410 ([www.ukbiobank.ac.uk](http://www.ukbiobank.ac.uk)) participants provided written informed consent, and ethical approval  
411 was granted by the North West Multi-Centre Ethics committee. Participants provided  
412 demographic and health information via touchscreen questionnaires. A nurse conducted a  
413 medical history interview, which included self-report of medical diagnoses and other conditions  
414 or life events that were used to evaluate eligibility to participate (study details are available at  
415 <http://www.ukbiobank.ac.uk/key-documents/>). Vital signs were obtained, and body mass index  
416 was calculated as weight (kg)/height<sup>2</sup> (m).

417 The data provided by the UK Biobank and was already subject to quality control<sup>61</sup>. We  
418 excluded individuals with IDP values outside a range of four standard deviations (SDs). We  
419 chose this lenient threshold as a non-trivial number of observations (97 for GM, 127 for WM) fall  
420 between three and four SDs away from the mean, given the large sample size. The IDPs

421 beyond the four SD range are likely the results of processing errors, or the corresponding  
422 individuals present severe brain irregularities (5 individuals for GM, 7 for WM). Note that the  
423 exclusion of these outliers does not change the statistical significance nor the magnitude of the  
424 effects that we report. The exclusion of individuals falling within three SDs of the mean does not  
425 change the results either.

#### 426 **Measures of alcohol consumption**

427 Participants self-reported the number of alcohol units (10 ml of pure ethanol) consumed,  
428 in “units per week” (for frequent drinkers) or “units per month” (for less frequent drinkers), across  
429 several beverage categories (red wine, white wine/champagne, beer/cider, spirits, fortified wine,  
430 and “other”). The UKB assessment defined units of alcohol as follows: a pint or can of  
431 beer/lager/cider = two units; a 25-ml single shot of spirits = one unit; and a standard glass of  
432 wine (175 ml) = two units. We computed the number of weekly units by summing the weekly  
433 units consumed in all categories. When reported monthly, the intake was converted to units per  
434 week by dividing by 4.3. The number of weekly units was divided by 7 to determine units per  
435 day.

#### 436 **MRI data acquisition and processing**

437 MRI data were acquired using a Siemens Skyra 3T scanner (Siemens Healthcare,  
438 Erlangen, Germany) using a standard 32-channel head coil, according to a freely available  
439 protocol ([http://www.fmrib.ox.ac.uk/ukbiobank/protocol/V4\\_23092014.pdf](http://www.fmrib.ox.ac.uk/ukbiobank/protocol/V4_23092014.pdf)), documentation  
440 ([http://biobank.ctsu.ox.ac.uk/crystal/docs/brain\\_mri.pdf](http://biobank.ctsu.ox.ac.uk/crystal/docs/brain_mri.pdf)), and publication<sup>40</sup>. As part of the  
441 scanning protocol, high-resolution T1-weighted images, three-dimensional T2-weighted fluid-  
442 attenuated inversion recovery (FLAIR) images, and diffusion data were obtained. High-  
443 resolution T1-weighted images were obtained using an MPRAGE sequence with the following  
444 parameters: TR=2000ms; TE=2.01ms; 208 sagittal slices; flip angle, 8°; FOV=256 mm;  
445 matrix=256×256; slice thickness=1.0mm (voxel size 1×1×1mm); total scan time=4min 54s. 3D  
446 FLAIR images were obtained with the following parameters: TR=1800ms; TE=395.0ms; 192

447 sagittal slices; FOV=256mm; 256×256; slice thickness=1.05mm (voxel size 1.05×1×1mm); total  
448 scan time=5min 52s. Diffusion acquisition comprised a spin-echo echo-planar sequence with  
449 10 T2-weighted ( $b \approx 0$  s  $\text{mm}^{-2}$ ) baseline volumes, 50  $b = 1000$  s  $\text{mm}^{-2}$  and 50  $b = 2000$  s  $\text{mm}^{-2}$   
450 diffusion-weighted volumes, with 100 distinct diffusion-encoding directions and 2 mm isotropic  
451 voxels; total scan time=6min 32s.

452 Structural imaging and diffusion data were processed by the UK Biobank team and  
453 made available to approved researchers as imaging-derived phenotypes (IDPs); the full details  
454 of the image processing and QC pipeline are available in an open-access article<sup>42,62</sup>. IDPs used  
455 in analyses included whole-brain GMV, whole-brain WMV, 139 regional GMV IDPs derived  
456 using parcellations from the Harvard-Oxford cortical and subcortical atlases and Diedrichsen  
457 cerebellar atlas (UKB fields 25782 to 25920), and 375 tract-averaged measures of fractional  
458 anisotropy (FA), mean diffusivity (MD), intra-cellular volume fraction (ICVF), isotropic volume  
459 fraction (ISOVF), and orientation diffusion (OD) extracted by averaging parameters over 74  
460 different white-matter tract regions based on subject-specific tractography<sup>63</sup> and from  
461 population-average WM masks<sup>45</sup>. Volumetric IDPs were normalized for head size by multiplying  
462 the raw IDP by the T1-based “head size scaling factor”<sup>62</sup>.

### 463 **Statistical Analyses**

464 **Descriptive analysis using global IDPs.** We plot global GMV and WMV in males and  
465 females separately, normalized for head size, against age (Figure 1) and alcohol intake (i.e.,  
466 alcohol units/day on a log scale) (Figure 2).

467 **Global IDPs, regional GMV, and WM microstructure analyses.** Our main analysis  
468 estimates a linear regression of several IDPs on alcohol intake in  $\log(1+\text{daily units})$ , including  
469 various control variables and interactions. Given the slight concavity of the LOWESS regression  
470 lines in the descriptive analysis of the global IDPs, we included both linear and quadratic values  
471 for alcohol intake and age in the regression:

$$472 \quad IDP_i = \beta_0 + \beta_1 X_i + \beta_2 X_i^2 + \beta_3 X_i \times SEX_i + \beta_4 X_i \times AGE_i + \gamma Z_i + e_i,$$

473

474 where  $IDP_i$  is the IDP normalized for head size,  $X_i$  is the standardized alcohol intake in log(1 +  
475 daily units),  $AGE_i$  is standardized age,  $Z_i$  is a vector of control variables, and  $e_i$  is an error term.

476 Our analyses comprise of models that include two different sets of control variables. The  
477 standard set includes standardized age, standardized age<sup>2</sup>, standardized height, handedness  
478 (right/left/ambidextrous; dummy-coded), sex (female:0, male:1), current smoker status, former  
479 light smoker, former heavy smoker, and standardized Townsend index of social deprivation  
480 measured at the zip code level<sup>64</sup>. To control for genetic population structure, the models also  
481 include the first 40 genetic principal components<sup>65</sup> and county of residence (dummy-coded)<sup>66</sup>. A  
482 second set of extended control variables includes all of the standard controls along with  
483 standardized body mass index (BMI), standardized educational attainment<sup>67</sup>, and standardized  
484 weight. To determine whether observations at the extreme ends of the drinking distribution bias  
485 the estimates of the relationship between alcohol intake and IDPs, we also estimate a model  
486 that excludes abstainers and a model that excludes heavy drinkers (i.e., women who reported  
487 consuming more than 18 units/week and men who consumed more than 24 units/week), both  
488 with standard controls. For each of the IDPs, we test the hypothesis that alcohol had no effect  
489 on the outcome measure via an F-test that compares our model against a model with only the  
490 control variables (excluding alcohol intake and related interaction terms).

491 We separate the analysis into two parts: (1) global analysis and (2) regional GMV and  
492 WM microstructure analysis, including 514 IDPs in total (139 GMV IDPs, 375 WM  
493 microstructure IDPs). The interactions of alcohol intake variables with sex and age are not  
494 significant in the global analysis ( $p > 0.001$ ), so we exclude these them from the regional  
495 analyses. To control the family-wise error rate in the regional GMV and WM microstructure  
496 analysis, we determine the significance thresholds for all regressions using the Holm method<sup>68</sup>,  
497 ensuring a family-wise error rate below 5%. When testing for M hypotheses, this method orders  
498 the corresponding p-values from lowest to highest:  $p_0, \dots, p_M$ , and identifies the minimal index  $k$

499 such that  $p_k > 0.05 / (M+1-k)$ . All hypotheses with an index  $m < k$  are then considered to be  
500 statistically significant. In our application, the significance threshold was determined to be  $1.64 \times$   
501  $10^{-4}$ .

502 To quantify and visualize associations between alcohol intake and IDPs (i.e., global  
503 GMV and WMV, and regional GMV IDPs), we bin participants in the following six categories  
504 based on average alcohol intake: (1) abstainers, (2) individuals who drank less than one  
505 unit/day, (3) individuals who drank between one (included) and two (excluded)  
506 units/day (recommended maximal alcohol consumption based on the UK Chief Medical Officers  
507 “low-risk” guidelines<sup>32</sup>), (4) individuals who drank between two (included) and three (excluded)  
508 units/day, (5) individuals who drank between three (included) and four (excluded) units/day, and  
509 (6) individuals who drank at least four units/day. After regressing the influence of the standard  
510 control variables, we then calculate the mean residual values (measured in standard deviations  
511 of IDPs) and 95% confidence intervals (CI). By first regressing the dependent variables on the  
512 standard control variables, the estimated effect can be interpreted as the part of the change in  
513 IDP that is not explained by these other variables, and it is represented in terms of standard  
514 deviations from the average. All results are available to the readers in extended data figures  
515 and tables. Specifically, Extended Data Tables 3 and 4 include the regression coefficients,  $p$ -  
516 values and incremental variance explained above that of control variables for all of the regional  
517 IDPs (both significant and non-significant). Extended Data Figure 2 includes the average GMV  
518 of all regions tested (both significant and non-significant), in bins of participants with different  
519 daily alcohol intake levels.

520 **Pre registration.** We registered the analysis plan was preregistered with the Open Science  
521 Foundation ([https://osf.io/trauf/?view\\_only=a3795f76c5a54830b2ca443e3e07c0f0](https://osf.io/trauf/?view_only=a3795f76c5a54830b2ca443e3e07c0f0)).

## 522 **Data Availability**

523 Data and materials are available via UK Biobank at <http://www.ukbiobank.ac.uk/>.

## 524 **Code Availability**

525 The analysis code used in this study is publicly available with the Open Science Framework

526 ([https://osf.io/trauf/?view\\_only=a3795f76c5a54830b2ca443e3e07c0f0](https://osf.io/trauf/?view_only=a3795f76c5a54830b2ca443e3e07c0f0)).

527

528

529

530

531

532

533

534

535

536

537

538

539

540

541

542

543

544

545

546

547

548

549

550



551 **References**

- 552 1. American Psychiatric Association. *Diagnostic and Statistical Manual of Mental Disorders*  
553 (5th ed.). Arlington, VA (2013).
- 554 2. World Health Organization. Global status report on alcohol and health 2018. License:  
555 CC BY-NC-SA 3.0 IGO. (2018).
- 556 3. Zahr, N. M. & Pfefferbaum, A. Alcohol's effects on the brain: Neuroimaging results in  
557 humans and animal models. *Alcohol Res.* **38**, 183-206 (2017).
- 558 4. Zaridze, D. *et al.* Alcohol and mortality in Russia: Prospective observational study of  
559 151,000 adults. *Lancet* **383**, 1465-1473 (2014).
- 560 5. Zahr, N. M. *et al.* Concomitants of alcoholism: Differential effects of thiamine deficiency,  
561 liver damage, and food deprivation on the rat brain in vivo. *Psychopharmacology* **233**,  
562 2675-2686 (2016).
- 563 6. Rehm, J., Shield, K. D. & Weiderpass, E. Alcohol consumption. A leading risk factor for  
564 cancer. *Chem Biol Interact.* **331**, 109280 (2020).
- 565 7. Robinson, O. *et al.* Determinants of accelerated metabolomic and epigenetic aging in a  
566 UK cohort. *Aging Cell.* **19**, e13149 (2020).
- 567 8. Luo, A. *et al.* Epigenetic aging is accelerated in alcohol use disorder and regulated by  
568 genetic variation in *APOL2*. *Neuropsychopharmacology* **45**, 327-336 (2020).
- 569 9. Sullivan, E. V. & Pfefferbaum, A. Brain-behavior relations and effects of aging and  
570 common comorbidities in alcohol use disorder: A review. *Neuropsychology* **33**, 760-780  
571 (2019).
- 572 10. de la Monte, S. M. & Kril, J. J. Human alcohol-related neuropathology. *Acta Neuropathol.*  
573 **127**, 71-90 (2014).
- 574 11. Galandra, C., Basso, G., Cappa, S. & Canessa, N. The alcoholic brain: Neural bases of  
575 impaired reward-based decision-making in alcohol use disorders. *Neurol Sci.* **39**, 423-  
576 435 (2018).

- 577 12. Zahr, N. M. Structural and microstructural imaging of the brain in alcohol use disorders.  
578 *Handb Clin Neurol.* **125**, 275-290 (2014).
- 579 13. Yang, X. *et al.* Cortical and subcortical gray matter shrinkage in alcohol-use disorders: A  
580 voxel-based meta-analysis. *Neurosci Biobehav Rev.* **66**, 92-103 (2016).
- 581 14. Makris, N. *et al.* Decreased volume of the brain reward system in alcoholism. *Biol*  
582 *Psychiatry* **64**, 192-202 (2008).
- 583 15. Rando, K. *et al.* Association of frontal and posterior cortical gray matter volume with time  
584 to alcohol relapse: A prospective study. *Am J Psychiatry* **168**, 183-192 (2011).
- 585 16. Zahr, N. M., Pfefferbaum, A. & Sullivan, E. V. Perspectives on fronto-fugal circuitry from  
586 human imaging of alcohol use disorders. *Neuropharmacology* **122**, 189-200 (2017).
- 587 17. Fein, G., Shimotsu, R. & Barakos, J. Age-related gray matter shrinkage in a treatment  
588 naive actively drinking alcohol-dependent sample. *Alcohol Clin Exp Res.* **34**, 175-182  
589 (2010).
- 590 18. Monnig, M. A., Tonigan, J. S., Yeo, R. A., Thoma, R. J. & McCrady, B. S. White matter  
591 volume in alcohol use disorders: A meta-analysis. *Addict Biol.* **18**, 581-592 (2013).
- 592 19. Kong, L. M., Zheng, W. B., Lian, G. P. & Zhang, H. D. Acute effects of alcohol on the  
593 human brain: Diffusion tensor imaging study. *AJNR Am J Neuroradiol.* **33**, 928-934  
594 (2012).
- 595 20. Pfefferbaum, A. & Sullivan, E. V. Disruption of brain white matter microstructure by  
596 excessive intracellular and extracellular fluid in alcoholism: Evidence from diffusion  
597 tensor imaging. *Neuropsychopharmacology* **30**, 423-432 (2005).
- 598 21. Fortier, C. B. *et al.* Widespread effects of alcohol on white matter microstructure. *Alcohol*  
599 *Clin Exp Res.* **38**, 2925-2933 (2014).
- 600 22. Pfefferbaum, A., Adalsteinsson, E. & Sullivan, E. V. Dymorphology and microstructural  
601 degradation of the corpus callosum: Interaction of age and alcoholism. *Neurobiol Aging*  
602 **27**, 994-1009 (2006).

- 603 23. Fritz, M., Klawonn, A. M. & Zahr, N. M. Neuroimaging in alcohol use disorder: From  
604 mouse to man. *J Neurosci Res.* (2019).
- 605 24. Pfefferbaum, A., Rosenbloom, M., Rohlfing, T. & Sullivan, E. V. Degradation of  
606 association and projection white matter systems in alcoholism detected with quantitative  
607 fiber tracking. *Biol Psychiatry* **65**, 680-690 (2009).
- 608 25. Churchill, N. W., Caverzasi, E., Graham, S. J., Hutchison, M. G. & Schweizer, T. A.  
609 White matter during concussion recovery: Comparing diffusion tensor imaging (DTI) and  
610 neurite orientation dispersion and density imaging (NODDI). *Hum Brain Mapp.* **40**, 1908-  
611 1918 (2019).
- 612 26. Zhang, H., Schneider, T., Wheeler-Kingshott, C. A. & Alexander, D. C. NODDI: Practical  
613 in vivo neurite orientation dispersion and density imaging of the human brain.  
614 *Neuroimage* **61**, 1000-1016 (2012).
- 615 27. Beaulieu, C. The basis of anisotropic water diffusion in the nervous system - a technical  
616 review. *NMR Biomed.* **15**, 435-455 (2002).
- 617 28. Paul, C. A. *et al.* Association of alcohol consumption with brain volume in the  
618 Framingham study. *Arch Neurol.* **65**, 1363-1367 (2008).
- 619 29. Mukamal, K. J., Longstreth, W. T., Jr., Mittleman, M. A., Crum, R. M. & Siscovick, D. S.  
620 Alcohol consumption and subclinical findings on magnetic resonance imaging of the  
621 brain in older adults: The cardiovascular health study. *Stroke* **32**, 1939-1946 (2001).
- 622 30. den Heijer, T. *et al.* Alcohol intake in relation to brain magnetic resonance imaging  
623 findings in older persons without dementia. *Am J Clin Nutr.* **80**, 992-997 (2004).
- 624 31. Gu, Y. *et al.* Alcohol intake and brain structure in a multiethnic elderly cohort. *Clin Nutr.*  
625 **33**, 662-667 (2014).
- 626 32. Sachdev, P. S., Chen, X., Wen, W. & Anstey, K. J. Light to moderate alcohol use is  
627 associated with increased cortical gray matter in middle-aged men: A voxel-based  
628 morphometric study. *Psychiatry Res.* **163**, 61-69 (2008).

- 629 33. Topiwala, A. *et al.* Moderate alcohol consumption as risk factor for adverse brain  
630 outcomes and cognitive decline: Longitudinal cohort study. *BMJ*. **357**, j2353 (2017).
- 631 34. Button, K. S. *et al.* Power failure: Why small sample size undermines the reliability of  
632 neuroscience. *Nat Rev Neurosci*. **14**, 365-376 (2013).
- 633 35. Gelman, A. & Carlin, J. Beyond power calculations: Assessing type s (sign) and type m  
634 (magnitude) errors. *Perspect Psychol Sci*. **9**, 641-651 (2014).
- 635 36. Fein, G. *et al.* Cortical and subcortical volumes in adolescents with alcohol dependence  
636 but without substance or psychiatric comorbidities. *Psychiatry Res*. **214**, 1-8 (2013).
- 637 37. Bobb, J. F., Schwartz, B. S., Davatzikos, C. & Caffo, B. Cross-sectional and longitudinal  
638 association of body mass index and brain volume. *Hum Brain Mapp*. **35**, 75-88 (2014).
- 639 38. Sullivan, E. V. *et al.* The role of aging, drug dependence, and hepatitis c comorbidity in  
640 alcoholism cortical compromise. *JAMA Psychiatry* **75**, 474-483 (2018).
- 641 39. Thayer, R. E. *et al.* Negative and interactive effects of sex, aging, and alcohol abuse on  
642 gray matter morphometry. *Hum Brain Mapp*. **37**, 2276-2292 (2016).
- 643 40. Cardon, L. R. & Palmer, L. J. Population stratification and spurious allelic association.  
644 *Lancet* **361**, 598-604 (2003).
- 645 41. Jennings, R. G. & Van Horn, J. D. Publication bias in neuroimaging research:  
646 Implications for meta-analyses. *Neuroinformatics* **10**, 67-80 (2012).
- 647 42. Miller, K. L. *et al.* Multimodal population brain imaging in the UK Biobank prospective  
648 epidemiological study. *Nat Neurosci*. **19**, 1523-1536 (2016).
- 649 43. Sudlow, C. *et al.* UK Biobank: An open access resource for identifying the causes of a  
650 wide range of complex diseases of middle and old age. *PLoS Med*. **12**, e1001779  
651 (2015).
- 652 44. Aydogan, G. *et al.* Genetic underpinnings of risky behavior relate to altered  
653 neuroanatomy. *Nature Human Behavior* in press.

- 654 45. Wakana, S. *et al.* Reproducibility of quantitative tractography methods applied to  
655 cerebral white matter. *Neuroimage* **36**, 630-644 (2007).
- 656 46. Immonen, S. *et al.* Moderate alcohol use is associated with decreased brain volume in  
657 early middle age in both sexes. *Sci Rep.* **10**, 13998 (2020).
- 658 47. Fukuda, K. *et al.* Alcohol intake and quantitative MRI findings among community  
659 dwelling Japanese subjects. *J Neurol Sci.* **278**, 30-34 (2009).
- 660 48. Hommer, D., Momenan, R., Kaiser, E. & Rawlings, R. Evidence for a gender-related  
661 effect of alcoholism on brain volumes. *Am J Psychiatry* **158**, 198-204 (2001).
- 662 49. Pfefferbaum, A., Sullivan, E. V., Mathalon, D. H. & Lim, K. O. Frontal lobe volume loss  
663 observed with magnetic resonance imaging in older chronic alcoholics. *Alcohol Clin Exp*  
664 *Res.* **21**, 521-529 (1997).
- 665 50. Perea, R. D. *et al.* Connectome-derived diffusion characteristics of the fornix in  
666 Alzheimer's disease. *Neuroimage Clin.* **19**, 331-342 (2018).
- 667 51. Nahum, L. *et al.* Neural correlate of anterograde amnesia in Wernicke-Korsakoff  
668 syndrome. *Brain Topogr.* **28**, 760-770 (2015).
- 669 52. Crespi, C. *et al.* Microstructural damage of white-matter tracts connecting large-scale  
670 networks is related to impaired executive profile in alcohol use disorder. *Neuroimage*  
671 *Clin.* **25**, 102141 (2020).
- 672 53. Peer, M., Nitzan, M., Bick, A. S., Levin, N. & Arzy, S. Evidence for functional networks  
673 within the human brain's white matter. *J Neurosci.* **37**, 6394-6407 (2017).
- 674 54. Kamal, H. *et al.* Alcohol use disorder, neurodegeneration, Alzheimer's and Parkinson's  
675 disease: Interplay between oxidative stress, neuroimmune response and excitotoxicity.  
676 *Front Cell Neurosci.* **14**, 282 (2020).
- 677 55. Crews, F. T. & Nixon, K. Mechanisms of neurodegeneration and regeneration in  
678 alcoholism. *Alcohol Alcohol.* **44**, 115-127 (2009).

- 679 56. Mallik, S., Samson, R. S., Wheeler-Kingshott, C. A. & Miller, D. H. Imaging outcomes for  
680 trials of remyelination in multiple sclerosis. *J Neurol Neurosurg Psychiatry* **85**, 1396-1404  
681 (2014).
- 682 57. Schneider, T. *et al.* Sensitivity of multi-shell NODDI to multiple sclerosis white matter  
683 changes: A pilot study. *Funct Neurol.* **32**, 97-101 (2017).
- 684 58. Pfefferbaum, A. *et al.* White matter microstructural recovery with abstinence and decline  
685 with relapse in alcohol dependence interacts with normal ageing: A controlled  
686 longitudinal DTI study. *Lancet Psychiatry* **1**, 202-212 (2014).
- 687 59. Gazdzinski, S., Durazzo, T. C., Mon, A., Yeh, P. H. & Meyerhoff, D. J. Cerebral white  
688 matter recovery in abstinent alcoholics--a multimodality magnetic resonance study. *Brain*  
689 **133**, 1043-1053 (2010).
- 690 60. Alhassoon, O. M. *et al.* Callosal white matter microstructural recovery in abstinent  
691 alcoholics: A longitudinal diffusion tensor imaging study. *Alcohol Clin Exp Res.* **36**, 1922-  
692 1931 (2012).
- 693 61. Smith, S., Alfaro-Almagro, F. & Miller, K. UK Biobank brain imaging documentation.  
694 [https://biobank.ctsu.ox.ac.uk/crystal/crystal/docs/brain\\_mri.pdf](https://biobank.ctsu.ox.ac.uk/crystal/crystal/docs/brain_mri.pdf). (2020).
- 695 62. Alfaro-Almagro, F. *et al.* Image processing and Quality Control for the first 10,000 brain  
696 imaging datasets from UK Biobank. *Neuroimage* **166**, 400-424 (2018).
- 697 63. de Groot, M. *et al.* Improving alignment in Tract-based spatial statistics: evaluation and  
698 optimization of image registration. *Neuroimage* **76**, 400-411 (2013).
- 699 64. Townsend, P., Phillimore, P. & Beattie, A. *Health and deprivation: Inequality and the*  
700 *North*. 1988, London;New York: Croom Helm. xvi, 211 p.
- 701 65. Cox, S. R. *et al.* Ageing and brain white matter structure in 3,513 UK Biobank  
702 participants. *Nat Commun.* **7**, 13629 (2016).
- 703 66. Price, A. L. *et al.* Principal components analysis corrects for stratification in genome-  
704 wide association studies. *Nat Genet.* **38**, 904-909 (2006).

- 705 67. Rietveld, C. A. *et al.* GWAS of 126,559 individuals identifies genetic variants associated  
706 with educational attainment. *Science* **340**, 1467-1471 (2013).
- 707 68. Holm, S. A Simple Sequentially Rejective Multiple Test Procedure. *Scand J Stat.* **6**, 65-  
708 70 (1979).
- 709
- 710
- 711

712 **Acknowledgments**

713 This research was carried out under the auspices of the Brain Imaging and Genetics in  
714 Behavioral Research Consortium (<https://big-bear-research.org/>), using UK Biobank resources  
715 under application 40830. The study was supported by funding from an ERC Consolidator Grant  
716 to PK (647648 EdGe), NSF Early Career Development Program grant (1942917) to GN, the  
717 National Institute on Alcohol Abuse and Alcoholism to RRW (K23 AA023894), and the VISN 4  
718 Mental Illness Research, Education and Clinical Center at the Crescenzo VA Medical Center. GN  
719 thanks Carlos and Rosa de la Cruz for ongoing support.

720

721 **Author contributions**

722 RD, PK, HRK, GN, and RRW conceived and designed the study. RD analyzed data. RD, GA,  
723 KJ, PK, HRK, GN, and RRW interpreted data. RD, GN and RRW wrote the paper. GA, NS, PK,  
724 and HRK, critically edited the work. RD, GN and RRW finalized all edits. All authors approved  
725 the final version to be submitted for publication and agree to be accountable for all aspects of  
726 this work.

727

728 **Competing interests**

729 HRK is a member of an advisory board for Dicerna Pharmaceuticals and of the American  
730 Society of Clinical Psychopharmacology's Alcohol Clinical Trials Initiative, which was supported  
731 in the last three years by AbbVie, Alkermes, Dicerna, Ethypharm, Indivior, Lilly, Lundbeck,  
732 Otsuka, Pfizer, Arbor, and Amygdala Neurosciences and is named as an inventor on PCT  
733 patent application #15/878,640 entitled: "Genotype-guided dosing of opioid agonists," filed  
734 January 24, 2018. All other authors declare no competing interests.

735
